# Supplementary material for: Polyaniline and CN-functionalized polyaniline as organic cathodes for lithium and sodium ion batteries: a combined molecular dynamics and density functional tight binding study in solid state
Source: Royal Society of Chemistry journal article supplement (doi:10.1039/c7cp06279f), 2017-11-27
Supplement: c7cp06279f1.pdf [file c7cp06279f1.pdf]

*Supplementary information*

**Polyaniline and CN-functionalized polyaniline as organic cathodes for lithium and sodium ion batteries: a combined molecular dynamics and Density Functional Tight Binding Study in solid state**

Yingqian Chen<sup>1</sup>, Johann Lüder<sup>1</sup>, Man-Fai Ng<sup>2</sup>, Michael Sullivan<sup>2</sup>, Sergei Manzhos<sup>1,a</sup>

<sup>1</sup> Department of Mechanical Engineering, Faculty of Engineering, National University of Singapore, Block EA #07-08, 9 Engineering Drive 1, Singapore 117576

<sup>2</sup> Institute of High Performance Computing, Agency for Science, Technology and Research, 1 Fusionopolis Way, #16-16 Connexis, Singapore 138632, Singapore

---

<sup>a</sup> Author to whom correspondence should be addressed. Tel: +65 6516 4605; Fax: +65 6779 1459; E-mail: [mpemanzh@nus.edu.sg](mailto:mpemanzh@nus.edu.sg)

### Calculation of Na<sup>+</sup>/Na potential:

$$E_{abs}(Na^+/Na) = E_{abs}^{aqueous}(Na^+/Na) + (E(Na_{solvent}^+) - E(Na_{aqueous}^+))$$

where  $E_{abs}^{aqueous}(Na^+/Na) = E_{abs}^{\circ}(SHE) + E^{\circ}(Na^+/Na) = 4.44 - 2.71 = 1.73 V$  [1];  $E(Na_{solvent}^+)$  and  $E(Na_{aqueous}^+)$  are the total energies of Na<sup>+</sup> calculated in the solvent and the aqueous solution, respectively. In this work, the difference between  $E(Na_{solvent}^+)$  and  $E(Na_{aqueous}^+)$  is  $\sim 0.01 V$ , which was computed similarly as in Ref. [2]. Therefore,  $E_{abs}(Na^+/Na) = 1.74 V$ .

Table S1. MD annealing and equilibration processes for amorphous PANI solid. The time step is set at 1 fs for all MD simulations.

| Stage | Ensemble | Temp (K) | Time (ps) | Pressure (GPa) | Stage | Ensemble | Temp (K) | Time (ps) | Pressure (GPa) |
|-------|----------|----------|-----------|----------------|-------|----------|----------|-----------|----------------|
| 1     | NVT      | 750      | 30        | 0.1            | 9     | NPT      | 298      | 100       | 3              |
| 2     | NVT      | 600      | 20        |                | 10    | NVT      | 600      | 20        | 0.5            |
| 3     | NVT      | 450      | 20        |                | 11    | NVT      | 450      | 20        |                |
| 4     | NVT      | 298      | 100       |                | 12    | NVT      | 298      | 100       |                |
| 5     | NPT      | 298      | 100       |                | 13    | NPT      | 298      | 100       |                |
| 6     | NVT      | 600      | 20        |                | 14    | NVT      | 600      | 20        |                |
| 7     | NVT      | 450      | 20        |                | 15    | NVT      | 450      | 20        |                |
| 8     | NVT      | 298      | 100       |                | 16    | NVT      | 298      | 100       |                |
|       |          |          |           |                | 17    | NPT      | 298      | 1000      | 0.0001         |

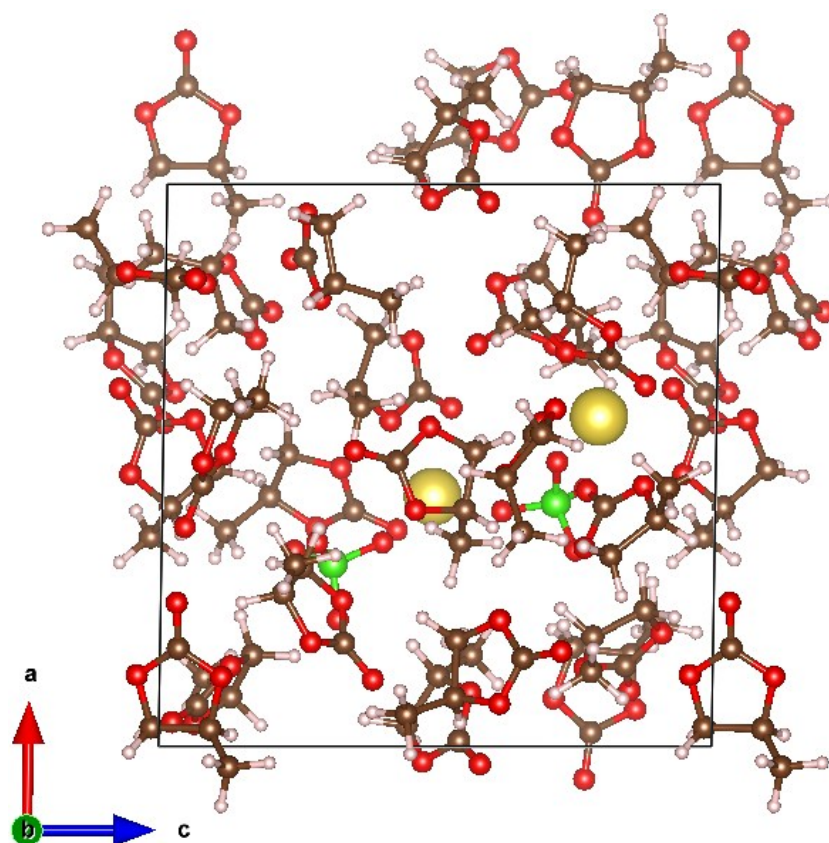

Figure S1. The periodic simulation cell of  $\text{NaClO}_4$  in the solvent – propylene carbonate (PC), computed in DFTB+. Atom color code: C – brown, H – pink, Cl – green, O – red, Na – yellow.

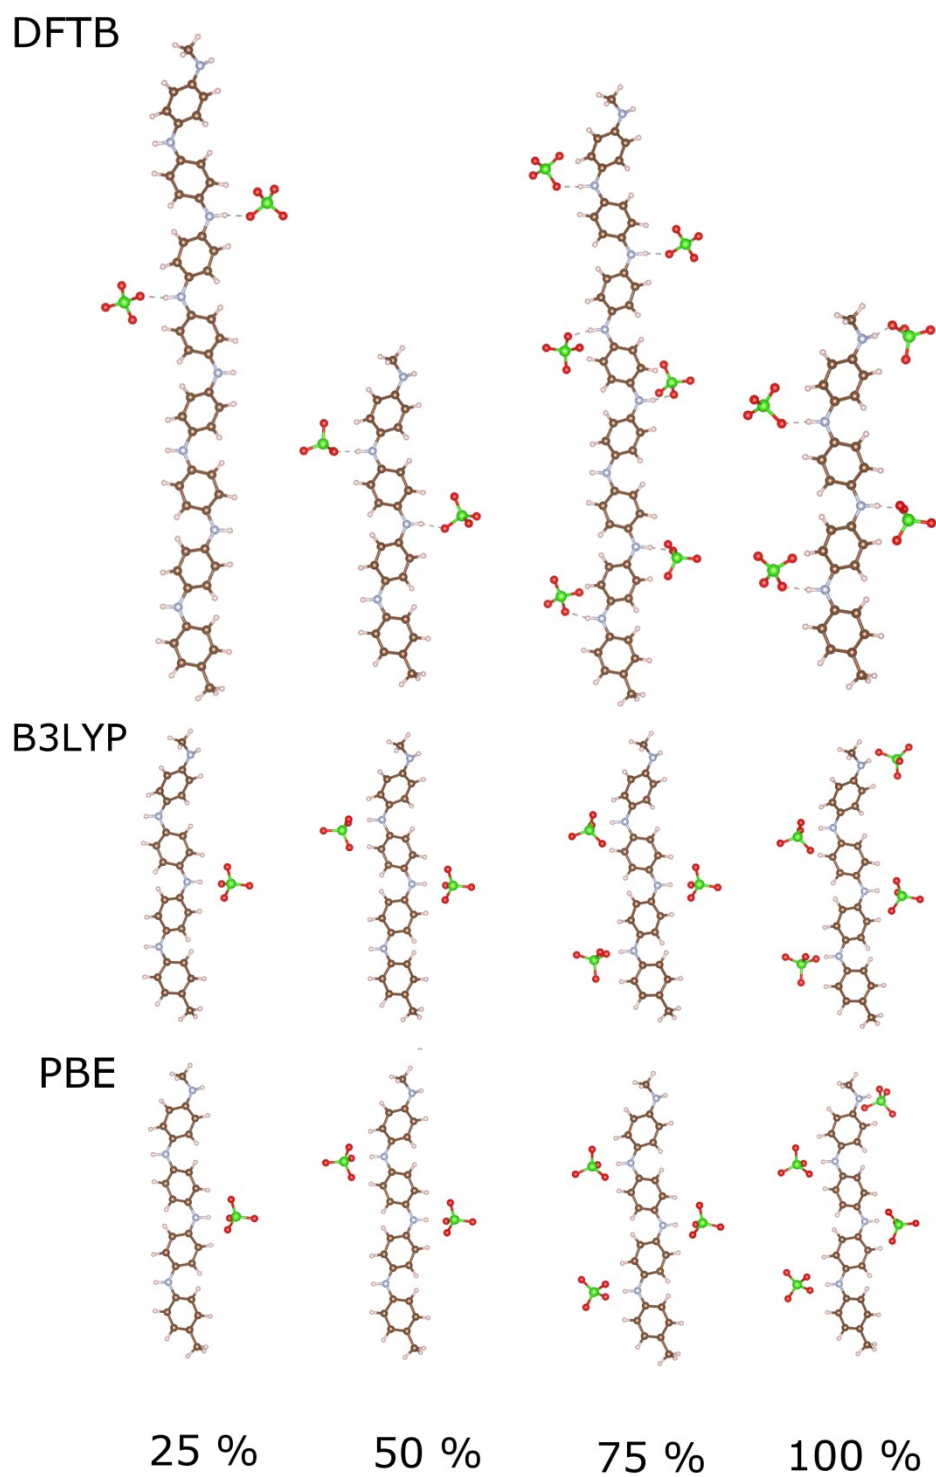

Figure S2. Lowest-energy structures of PANI oligomers coordinated to different numbers of  $\text{ClO}_4^-$  anions, computed with different functionals (see the main text for  $\omega\text{B97XD}$  structures).

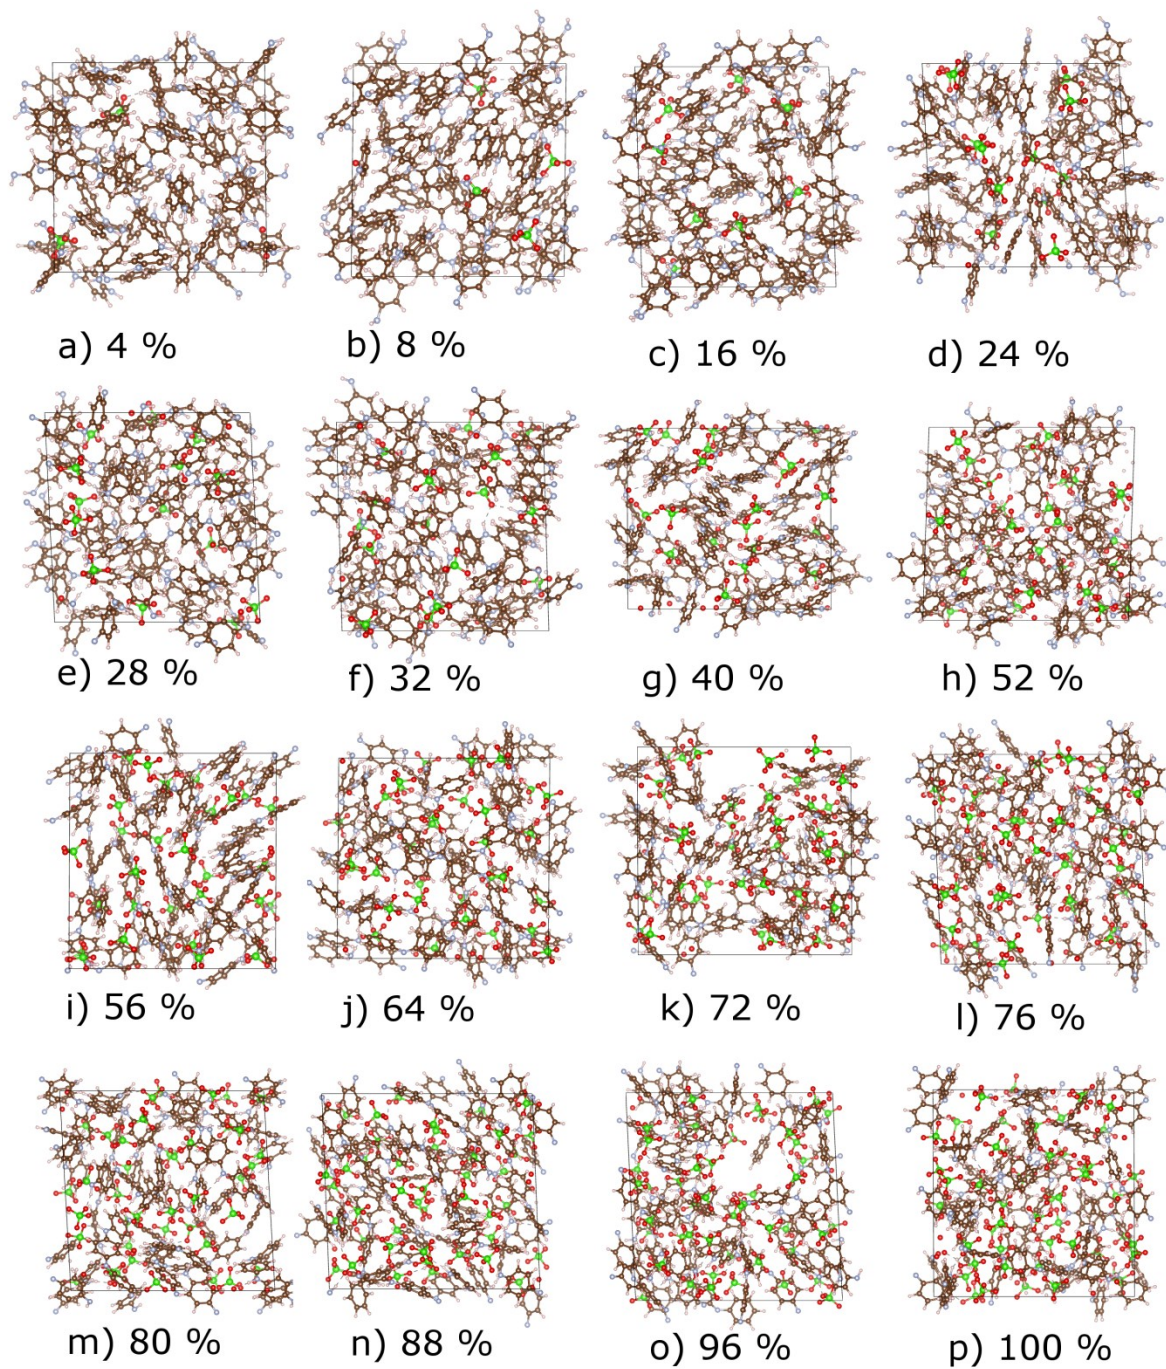

Figure S3. Optimized structures of PANI at different degrees of oxidation from 4 % in (a) to 100% in (p).



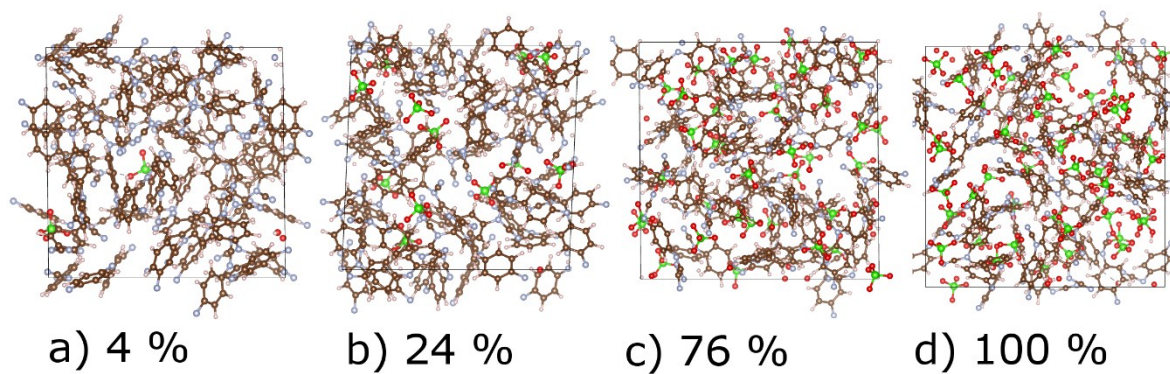

Figure S4. Optimized structures of PANI functionalized with cyano groups at different degrees of oxidation from 4 % in (a) to 100% in (d).

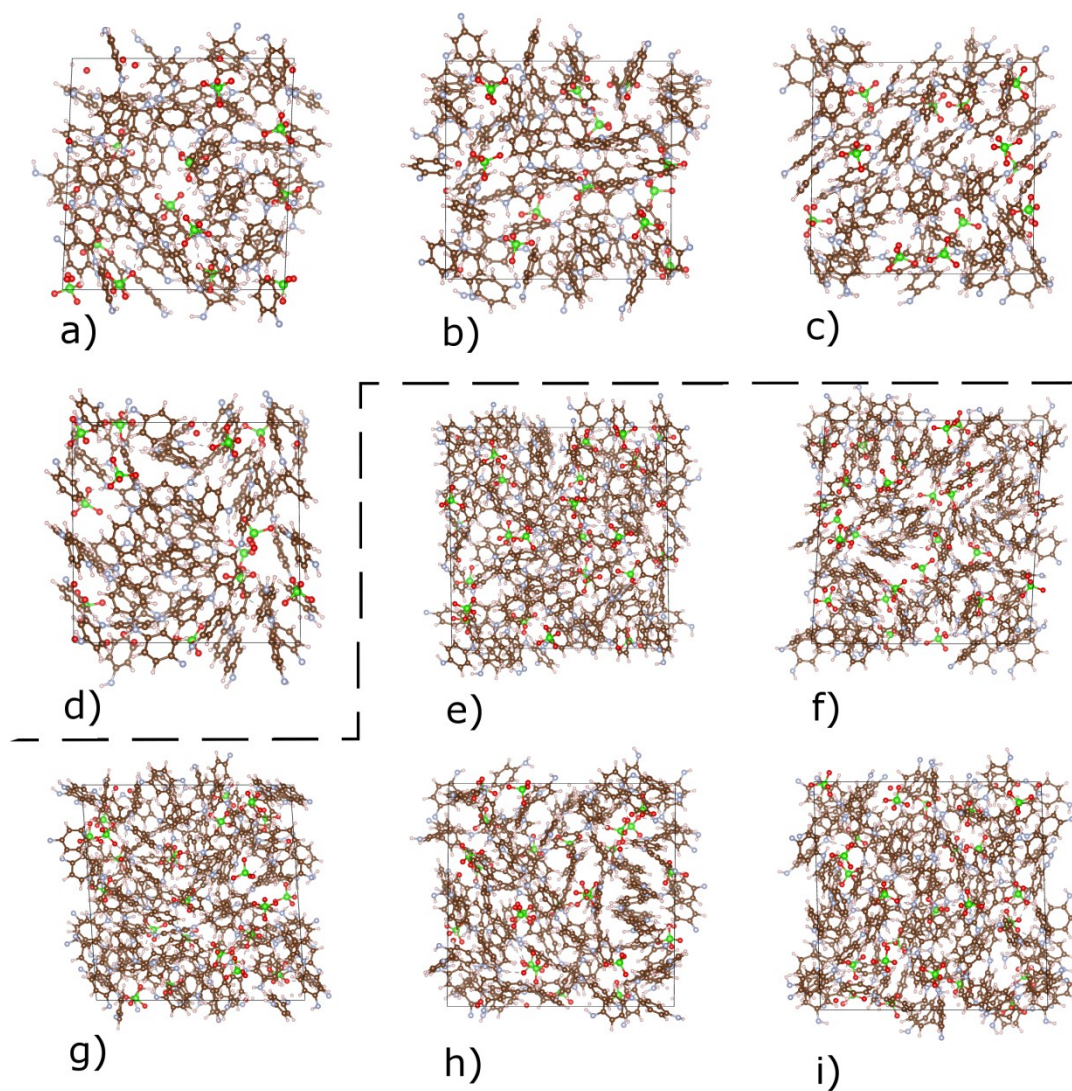

Figure S5. Computed structures for different distributions of counter ions in 24 % oxidized PANI. (a) to (d) show the structures containing 5 oligomer chains and (e) to (i) those containing 10 oligomer chains.

## References

- [1] D.D. Ebbing, General Chemistry, 3rd ed., Houghton Mifflin, Boston, 1990.
- [2] Y. Chen, S. Manzhos, Voltage and Capacity Control of Polyaniline Based Organic Cathodes: An Ab Initio Study, *Journal of Power Sources*, **336** (2016) 126-131.
